# Supplementary material
Source: PubMed Central journal article supplement (PMC9681656)

**Supplemental Figure 1: Number and rates of newly diagnosed pregnancies in clinic from April 2018 to June 2021**

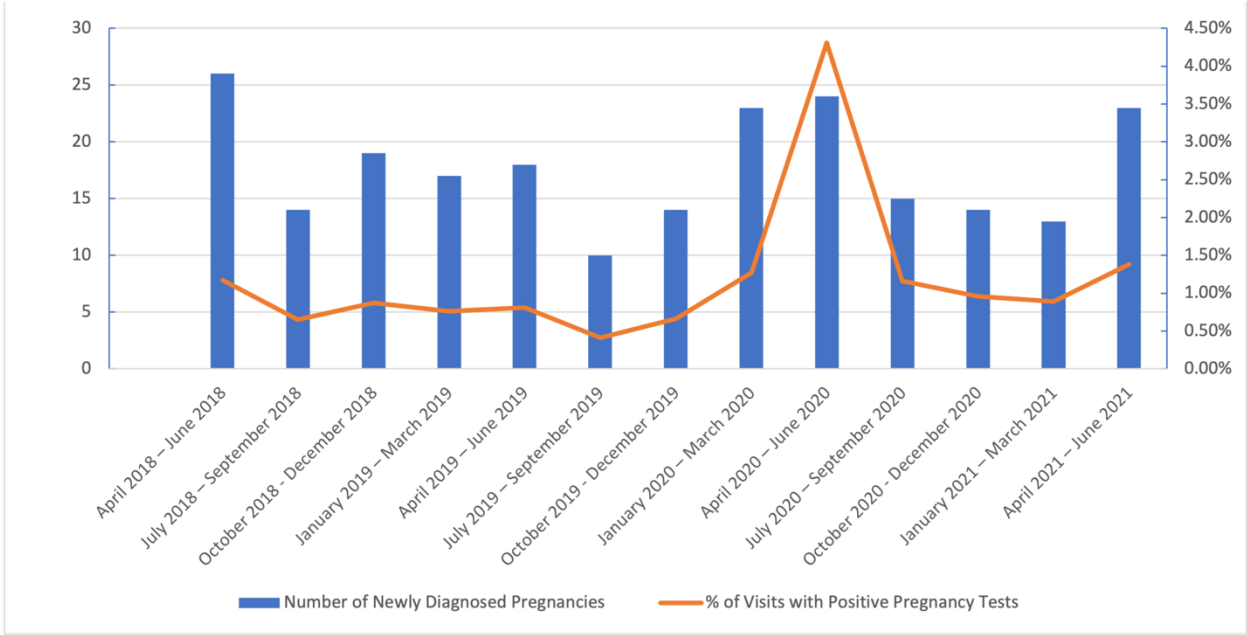

Supplement: sj-pdf-1-cpj-10.1177_00099228221137479.pdf [file sj-pdf-1-cpj-10.1177_00099228221137479.pdf]
