# Supplementary material
Source: PubMed Central journal article supplement (PMC9681656)
Supplement: sj-pdf-2-cpj-10.1177_00099228221137479.pdf [file sj-pdf-2-cpj-10.1177_00099228221137479.pdf]

**Supplemental Table 2: Number of LARC visits**

| Timeframe                    | Number of LARC Visits | Insertions and Reinsertions | Removals | % of LARC visits | % of Insertion/ Reinsertion Visits | % of Removal Visits |
|------------------------------|-----------------------|-----------------------------|----------|------------------|------------------------------------|---------------------|
| April 2018 – June 2018       | 103                   | 77                          | 26       | 4.65%            | 3.48%                              | 1.17%               |
| July 2018 – September 2018   | 115                   | 89                          | 26       | 5.33%            | 4.12%                              | 1.20%               |
| October 2018 - December 2018 | 113                   | 78                          | 35       | 5.20%            | 3.59%                              | 1.61%               |
| January 2019 – March 2019    | 99                    | 71                          | 28       | 4.44%            | 3.18%                              | 1.26%               |
| April 2019 – June 2019       | 156                   | 114                         | 42       | 7.06%            | 5.16%                              | 1.90%               |
| July 2019 – September 2019   | 137                   | 105                         | 32       | 5.66%            | 4.34%                              | 1.32%               |
| October 2019 - December 2019 | 135                   | 93                          | 42       | 6.40%            | 4.41%                              | 1.99%               |
| January 2020 – March 2020    | 110                   | 67                          | 43       | 6.07%            | 3.70%                              | 2.37%               |
| April 2020 – June 2020       | 63                    | 44                          | 19       | 11.31%           | 7.90%                              | 3.41%               |
| July 2020 – September 2020   | 139                   | 93                          | 46       | 10.73%           | 7.18%                              | 3.55%               |
| October 2020 - December 2020 | 139                   | 92                          | 47       | 9.51%            | 6.30%                              | 3.22%               |
| January 2021 – March 2021    | 95                    | 71                          | 24       | 6.52%            | 4.88%                              | 1.65%               |
| April 2021 – June 2021       | 101                   | 73                          | 28       | 6.06%            | 4.38%                              | 1.68%               |
